# Supplementary material for: Unveiling the Probiotic Potential of Streptococcus thermophilus MCC0200: Insights from In Vitro Studies Corroborated with Genome Analysis
Source: MDPI journal article supplement (doi:10.3390/microorganisms12020347), 2024-02-07
Supplement: s1 [file s1]

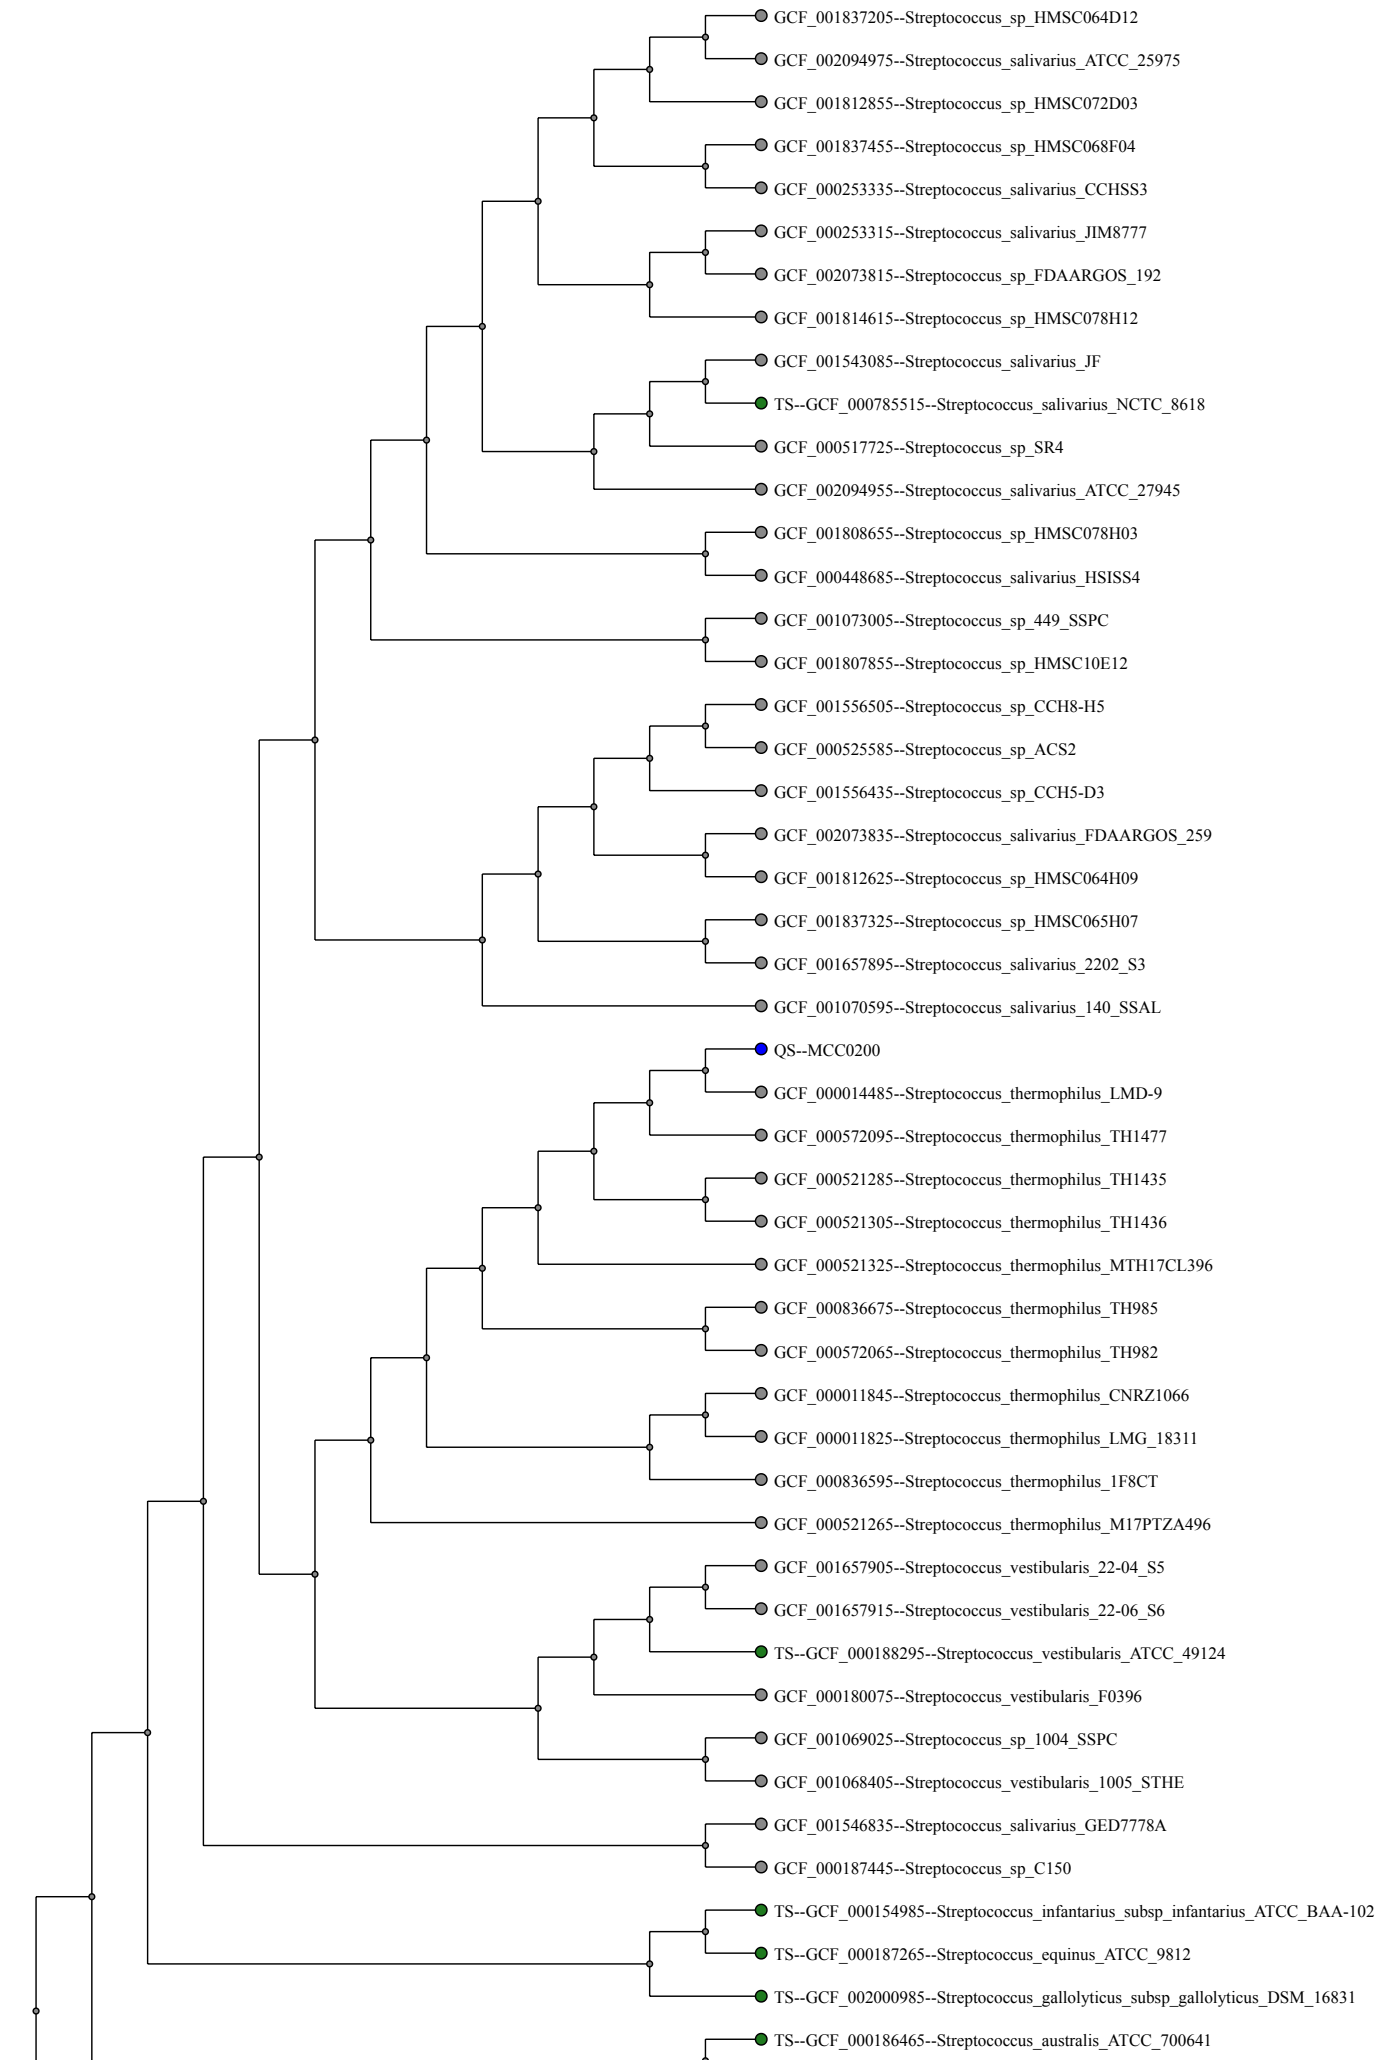

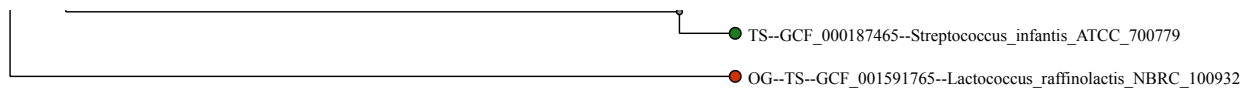

Figure S1. MLST tree constructed based on various housekeeping genes by autoMLST. The highlighted sequence is the query sequence of MCC0200.

Table S1. Ability of MCC0200 to survive in Simulated Gastric fluid at different time intervals

| <b>Time interval<br/>(min)</b> | <b>Total Viable Count of MCC0200<br/>(CFU/ml)</b> |
|--------------------------------|---------------------------------------------------|
| 0                              | $3.75 \pm 10 \times 10^7$                         |
| 30                             | $2 \pm 0 \times 10^4$                             |
| 60                             | $1.5 \pm 0 \times 10^2$                           |

Table S2. Ability of MCC0200 to survive in Simulated Intestinal fluid at different time intervals

| <b>Time interval<br/>(min)</b> | <b>Total Viable Count of MCC0200 (CFU/ml)</b> |
|--------------------------------|-----------------------------------------------|
| 0                              | $1.22 \pm 1.76 \times 10^8$                   |
| 30                             | $6.5 \pm 0.84 \times 10^7$                    |
| 60                             | $5.85 \pm 0.07 \times 10^7$                   |
| 120                            | $2.3 \pm 0 \times 10^7$                       |
| 240                            | $1.45 \pm 0.07 \times 10^7$                   |
| 360                            | $1.1 \pm 0.28 \times 10^7$                    |
